# Supplementary material
Source: publisher site journal article supplement (https://www.dovepress.com/article/supplementary_file/483326/Table%20S1%20.docx)
Supplement: Supplementary file 1 [file Table%20S1%20.docx]

Table S1 Comparison of etiological components between patients with NTM-PD and those with NTM-PD with bronchiectasis

|  |  | NTM-PD with bronchiectasis  (n=24) | NTM-PD  (n=19) | *P*-value |
| --- | --- | --- | --- | --- |
| Fungus | Candida spp. | 2 | 2 | 1.000 |
|  | Aspergillus spp. | 2 | 2 | 1.000 |
|  | Bordetella spp. | 1 | 0 | 1.000 |
|  | *Pneumocystis jirovecii* | 0 | 1 | 0.442 |
| Bacteria | *Acinetobacter baumannii* | 1 | 3 | 0.306 |
|  | *Serratia marcescens* | 0 | 1 | 0.442 |
|  | *Haemophilus influenzae* | 2 | 3 | 0.640 |
|  | *Staphylococcus aureus* | 1 | 1 | 1.000 |
|  | *Streptococcus pneumoniae* | 1 | 3 | 0.306 |
|  | *Escherichia coli* | 1 | 0 | 1.000 |
|  | *Enterococcus faecalis* | 0 | 1 | 0.442 |
|  | *Pseudomonas aeruginosa* | 2 | 2 | 1.000 |
|  | *Stenotrophomonas maltophilia* | 0 | 1 | 0.442 |
|  | *Corynebacterium striatum* | 3 | 4 | 0.680 |
